1 **Environments and host genetics influence the geographic distribution of plant microbiome**  
2 **structure**

3

4 Na Wei<sup>1</sup> and Jiaqi Tan<sup>2</sup>

5

6 <sup>1</sup>The Holden Arboretum, Kirtland, OH 44094, USA

7 <sup>2</sup>Department of Biological Sciences, Louisianan State University, Baton Rouge, LA 70803, USA

8

9 **Correspondence:**

10 Na Wei (ORCID: 0000-0002-7345-501X)

11 Email: [nwei@holdenfg.org](mailto:nwei@holdenfg.org)

12 Jiaqi Tan (ORCID: 0000-0001-8357-1965)

13 Email: [jtan7@lsu.edu](mailto:jtan7@lsu.edu)

14

15 **Acknowledgements.** We thank Maris Hollowell for the assistance in microbiome DNA  
16 extraction and duckweed genotyping, Jada Daniels, Zhijun Ding, Jessica LaBella, Cordelia  
17 Zheng, Olivia Walker, and Reetu Shrestha for the assistance in sample collection and processing.

18

19 **Conflict of Interest.** The authors declare that they have no competing interests.

20

21 **Authors Contributions.** Na Wei and Jiaqi Tan administered the research. Na Wei conceived the  
22 conceptual development of the research. Na Wei and Jiaqi Tan collected the data. Na Wei

23 conducted data analyses and visualization and wrote the manuscript. Na Wei and Jiaqi Tan  
24 contributed to manuscript revision.

25

26 **Data accessibility.** Sequences of microbiomes available from NCBI Sequence Read Archive (to  
27 be uploaded). All other data available from the Dryad Digital Repository (to be uploaded).

28

29 **Funding.** This work was supported by the Holden Arboretum (030869 to Na Wei); and the  
30 Gordon and Betty Moore Foundation Symbiosis in Aquatic Systems Initiative (10635 to Jiaqi  
31 Tan).

32

33

34

35

36

37

38

39

40

41

42

43

44

45

46 **Abstract**

- 47 1. To understand how microbiota influence plant populations in nature, it is important to  
48 examine the geographic distribution of plant-associated microbiomes and the underlying  
49 mechanisms. However, we currently lack a fundamental understanding of the biogeography  
50 of plant microbiomes and the environmental and host genetic factors that shape their  
51 distribution.
- 52 2. Leveraging the broad distribution and extensive genetic variation in duckweeds (the *Lemna*  
53 species complex), we identified the key factors that influenced the geographic distribution of  
54 plant microbiome diversity and compositional variation.
- 55 3. In line with the pattern observed in microbial biogeography based on free-living  
56 environmental microbiomes, we observed higher bacterial richness in temperate regions  
57 relative to lower latitudes in duckweed microbiomes (with 10% higher in temperate  
58 populations). Our analyses revealed that temperature and sodium concentration in aquatic  
59 environments had a negative impact on duckweed bacterial richness, whereas temperature,  
60 precipitation, pH, and concentrations of phosphorus and calcium, along with duckweed  
61 genetic variation, influenced the geographic variation of duckweed bacterial community  
62 composition.
- 63 4. The findings add significantly to our understanding of host-associated microbial  
64 biogeography and provide insights into the relative impact of different ecological processes,  
65 such as selection by environments and host genetics, dispersal, and chance, on plant  
66 microbiome assembly. These insights have important implications for predicting plant  
67 microbiome vulnerability and resilience under changing climates and intensifying  
68 anthropogenic activities.

69

70 **Keywords**

71 biogeography, duckweeds, freshwater ecosystem, host genetics, microbiome, water chemistry

72

73 **Introduction**

74 Plants host diverse microbial symbionts, and these microbial symbionts are important for the  
75 functioning of plants within ecosystems (Laforest-Lapointe et al., 2017; Tan et al., 2023). To  
76 better understand the influence of microbiomes on plant populations across geographic ranges in  
77 nature, it is important to examine the distribution patterns of plant-associated microbiomes and  
78 the mechanisms that drive these patterns. While our knowledge of microbial biogeography has  
79 advanced greatly through investigating free-living environmental microbiomes across terrestrial,  
80 marine, and atmospheric ecosystems (Tedersoo et al., 2014; Sunagawa et al., 2015; Bahram et  
81 al., 2018; Zhao et al., 2022), significant knowledge gaps exist as to what drives the geographic  
82 distribution of local microbiome diversity and compositional variation across populations in  
83 host-associated microbiomes, such as plant microbiomes. It is also unclear whether the principles  
84 of microbial biogeography derived from free-living microbiomes can be generalized to host-  
85 associated microbiomes.

86 While various biogeography theories have been proposed to explain the distribution of  
87 diversity in plants and animals (Rosenzweig, 1995), microbial diversity does not always follow  
88 the same patterns as observed in their macroscopic counterparts (Chu et al., 2020). For instance,  
89 fungal diversity in soil microbiomes follows a latitudinal gradient, decreasing from lower to  
90 higher latitudes (Tedersoo et al., 2014; Bahram et al., 2018), similar to the patterns observed in  
91 plants and animals (Rosenzweig, 1995). However, global bacterial diversity peaks in temperate

92 regions across soil, marine, and airborne microbiomes (Tedersoo et al., 2014; Sunagawa et al.,  
93 2015; Bahram et al., 2018; Zhao et al., 2022). The biogeography of free-living environmental  
94 microbiomes, therefore, indicates that ecological factors that may or may not follow latitudinal  
95 gradients can drive the geographic distribution of microbial diversity. Factors that exhibit a  
96 correlation with latitude may contribute to an observed latitudinal gradient of microbial diversity,  
97 as seen in the case of precipitation which predicts the distribution of soil fungal richness  
98 (Tedersoo et al., 2014). By contrast, factors that do not exhibit such a correlation may weaken  
99 and lead to a distinct biogeographic pattern, as seen in the case of pH which predicts the  
100 distribution of soil bacterial richness (Fierer & Jackson, 2006; Bahram et al., 2018). Compared to  
101 free-living microbiomes, plant microbiomes are subject to host-imposed niche filtering (Wei &  
102 Ashman 2018; Wei et al., 2022), which has the potential to reinforce or modify the role of  
103 environmental factors in driving microbial biogeography. The extent to which host plants, such  
104 as their genetic variation, affect the geographic distribution of microbial diversity may depend on  
105 whether hosts have adapted to the same or different environmental factors that influence  
106 microbial diversity. If hosts exhibit adaptation to the same environmental factors as microbes,  
107 host genetic variation may contribute to the observed patterns of microbial diversity caused by  
108 environments, while dissimilar adaptations may weaken the patterns.

109 Another notable pattern of microbial biogeography is the decay in microbial community  
110 similarity over geographic distance. Such distance decay is common across ecosystems  
111 (Sunagawa et al., 2015; Bahram et al., 2018; Zhao et al., 2022), and can arise due to a  
112 combination of ecological processes including dispersal limitation, environmental heterogeneity,  
113 and chance (Vellend, 2010; Mittelbach & Schemske, 2015). While dispersal limitation and  
114 chance promote stochasticity and play a major role in driving the geographic variation of

115 microbial community composition in nature (Zhao et al., 2022), environmental heterogeneity is  
116 also important and drives niche-based selection (Fierer & Jackson, 2006; Tedersoo et al., 2014;  
117 Sunagawa et al., 2015; Bahram et al., 2018). For instance, in terrestrial ecosystems, variation in  
118 soil pH and nutrient concentration leads to variation in soil bacterial community composition  
119 (Fierer & Jackson, 2006; Bahram et al., 2018). Similarly, in marine ecosystems, temperature  
120 variation is the primary driver of variation in bacterial community composition in surface waters  
121 (Sunagawa et al., 2015). In addition to selection by environments, selection by host genetic  
122 variation may also contribute to the geographic variation of microbiome composition associated  
123 with plants, and the respective and collective roles of host genetic and environmental variation  
124 will depend on the extent to which host genetic variation is shaped by the same or different  
125 environmental factors.

126       To enhance our understanding of the geographic distribution of microbiome diversity and  
127 compositional variation in plant microbiomes and the underlying mechanisms, we leveraged the  
128 broad distribution and extensive genetic variation of the duckweed, *Lemna* species complex  
129 (referred to as *Lemna* or duckweeds for simplicity). *Lemna* is floating aquatic plants commonly  
130 found in slow-moving freshwater ecosystems worldwide (Landolt, 1986), and plays an important  
131 role in ecosystem functions and services, such as carbon sequestration, phytoremediation, biofuel  
132 production, and animal feedstock (Cao et al., 2018; Acosta et al., 2021). In *Lemna*, hybridization  
133 has led to extensive genetic variation, making this species complex morphologically similar  
134 (Braglia et al., 2021). In this study, we examined *Lemna* microbiomes across 34 different  
135 populations in the United States, covering both the cool temperate and hot humid subtropical  
136 regions. Our purposes were twofold. First, we sought to test the hypothesis that bacterial richness  
137 is higher in temperate regions relative to lower latitudes and uncover the environmental and host

138 genetic factors driving the observed pattern. Second, we aimed to quantify the respective impact  
139 of ecological processes (e.g. selection, dispersal limitation, chance) on microbiome assembly and  
140 identify the environmental and host genetic factors driving the geographic variation of bacterial  
141 community composition.

142

## 143 **Materials and Methods**

### 144 *Field collection*

145 We collected *Lemna* and its microbiomes from 34 populations in the northern and southern range  
146 of its distribution in the United States (Fig. 1a and Table S1): Ohio (OH, Cleveland,  $N = 8$ ;  
147 Columbus,  $N = 5$ ), New Hampshire (NH,  $N = 2$ ), Massachusetts (MA,  $N = 2$ ), Rhode Island (RI,  
148  $N = 2$ ), Louisiana (LA,  $N = 7$ ), Georgia (GA,  $N = 4$ ), and South Carolina (SC,  $N = 4$ ). The field  
149 sampling was conducted during the fast-growing season of duckweeds during June–August  
150 2022. In addition, we collected samples from the two Massachusetts populations during the late  
151 growing season in October 2022 to confirm the negligible influence of temporary dynamics on  
152 duckweed microbiomes, relative to the other factors we investigated in this study. Specifically, at  
153 each population, we collected duckweeds using ethanol-sterilized forks into sterile plastic bags  
154 and stored them at 4 °C until microbiome isolation within five days. We also measured the pH,  
155 conductivity (EC), and total dissolved solids (TDS) of the aquatic environment at each  
156 population using an Ohaus ST20M-B meter (Ohaus Corporation, Parsippany, New Jersey).  
157 Additionally, we collected 100 mL surface water in sterile centrifuge tubes and sent to the  
158 Wetland Biochemistry Analytical Services at Louisiana State University for additional water  
159 chemistry analysis (total organic carbon, TOC; total nitrogen, TN; total phosphorus, TP; major  
160 and trace elements including Na, Ca, Mg, Fe, Si, Cu, Zn, Mn, Pb, Cd; Table S1).

161  
162 *Microbiome isolation and sequencing*  
163 Duckweed microbiome isolation was conducted sterilely under a laminar flow hood. For each  
164 population, we used sterilized forceps to remove debris from *Lemna*, and rinsed *c.* 500  
165 individuals in 20 mL sterile water to remove environmental microbes from their aquatic habitats.  
166 These individual plants were then transferred to 20 mL sterile 0.25× phosphate buffered saline.  
167 We collected epiphytic microbiomes by vortexing for 20 min, sonicating at 40 kHz for 5 min,  
168 and centrifuging at 13,200 rpm for 10 min. Microbial cells (from 5 mL out of the 20 mL  
169 epiphytic microbiome wash) were used for DNA extraction using cetyltrimethylammonium  
170 bromide (CTAB) and purified using polyethylene glycol (PEG) 8000. Briefly, microbial pellets  
171 were lysed with 500  $\mu$ L sterile CTAB buffer (2% w/v CTAB, 100 mM Tris-HCl, 20 mM EDTA,  
172 1.4 M NaCl, 5 mM ascorbic acid, and 10 mM dithiothreitol) and two autoclaved 4 mm stainless  
173 steel beads on a Vortex Genie 2 (Scientific Industries, Bohemia, New York) for 40 min. An  
174 equal volume (500  $\mu$ L) of chloroform : isoamyl alcohol (24 : 1) was then added for phage  
175 separation at 13,200 rpm for 5 min. DNA was then recovered by adding the upper phase to 1 mL  
176 of cold pure ethanol overnight at -20°C and centrifuging at 13,200 rpm for 5 min. Pelleted DNA  
177 was washed with 500  $\mu$ L of cold 70% ethanol and eluted in sterile TE buffer. We further purified  
178 the eluted DNA by conducting an additional round of chloroform : isoamyl alcohol phase  
179 separation, and then DNA was recovered by adding the upper phase to an equal volume of  
180 autoclaved PEG 8000 (20% w/v PEG 8000, 2.5 M NaCl), incubating at 37 °C for 30 min, and  
181 centrifuging at 13,200 rpm for 5 min. Purified DNA pellet was washed with cold 70% ethanol  
182 and eluted in 60  $\mu$ L sterile TE buffer and sent to the Argonne National Laboratory for bacterial



183 library preparation (16S rRNA V5–V6 region, 799f–1115r primer pair) and sequencing using  
184 Illumina MiSeq (paired-end 250 bp).

185         The paired-end (PE) reads were used for detecting bacterial amplicon sequence variants  
186 (ASVs) using the package DADA2 v1.20.0 (Callahan et al., 2016) in R v4.1.0 (R Core Team,  
187 2021). Following previous pipelines (Wei et al., 2021, 2022), the PE reads were trimmed and  
188 quality filtered [truncLen = c(240, 230), trimLeft=c(10, 0), maxN = 0, truncQ = 2, maxEE =  
189 c(2,2)] and then used for unique sequence identification that took into account sequence errors.  
190 The PE reads were then end joined (minOverlap = 20, maxMismatch = 4) for ASV detection and  
191 chimera removal. The ASVs were assigned with taxonomic identification based on the SILVA  
192 reference database (132 release NR 99) implemented in DADA2. The ASVs were further filtered  
193 before conversion into a bacterial community matrix using the package phyloseq (McMurdie &  
194 Holmes, 2013). First, we removed non-focal ASVs (Archaea, chloroplasts, and mitochondria).  
195 Second, we conducted rarefaction analysis using the package iNEXT (Hsieh et al., 2020) to  
196 confirm that the sequencing effort was sufficient to capture duckweed bacterial richness (Fig.  
197 S1). We further normalized per-sample reads (median = 20,192 reads) by rarefying to 10,000  
198 reads. Three populations with fewer reads (one from OH: 9787 reads; two from GA: 5775 and  
199 9484 reads, respectively) were normalized to 10,000 reads following the previous pipeline (Wei  
200 et al., 2021). Lastly, we removed low-frequency ASVs (<0.001% of total observations). The  
201 final bacterial community matrix consisted of 4880 ASVs across the 36 samples from 34  
202 different populations.

203

204 *Lemna genotyping*

205 After microbiome isolation, duckweeds were bleached to create axenic plants. Briefly, *c.* 30  
206 clusters (100 plants) per population were bleached in 15 mL 1% sodium hypochlorite until  
207 clusters turned white, and then washed in 15 mL sterile water three times. Individual clusters  
208 were then grown in 0.5× Hoagland salt (PhytoTech Labs, Lenexa, Kansas) with 0.5% sucrose  
209 under 24 °C and 16 h light for contamination check. A single axenic cluster was selected from a  
210 population (referred to as one genetic line) for further propagation in the same media for DNA  
211 extraction. Fresh duckweeds (*c.* 60 clonal plants) of each genetic line were used for DNA  
212 extraction using E.Z.N.A. SP Plant DNA Kit (Omega Bio-Tek Inc., Norcross, Georgia) and  
213 eluted in 100 µL sterile TE buffer. To examine duckweed genetic variation, we genotyped the  
214 genetic lines ( $N = 25$ , due to the unsuccess in generating some of the axenic genetic lines; Table  
215 S2). We used three polymorphic ISSR markers (UBC827, UBC855, UBC856) that generated a  
216 total of 46 polymorphic bands across the genetic lines (Table S2). PCRs were carried out in 10-  
217 µL reactions that contained 1.5 µL of extracted DNA, 0.5 µM primer, 4 mM MgCl<sub>2</sub>, 0.5 mg/mL  
218 BSA, 5 µL GoTaq Colorless Master Mix (Promega Corporation, Madison, Wisconsin) including  
219 200 µM of each dNTP and 1 unit Taq DNA polymerase, and H<sub>2</sub>O. PCRs followed a standard  
220 protocol: 94 °C for 5 min; 40 cycles of 94 °C for 1 min, 52 °C for 1 min, and 72 °C for 1 min; and  
221 a final extension at 72 °C for 5 min. PCR amplicons were quantified with GeneRuler 100bp plus  
222 DNA Ladder (Thermo Fisher Scientific Inc., Waltham, Massachusetts) on 1.5% agarose gels in  
223 1× TBE buffer under 95V for 1:40 h.

224 Alleles were scored as presence or absence (1 or 0) using GelJ v2.0 (Heras et al., 2015).  
225 Population genetic structure was analyzed using STRUCTURE v2.3.4 (Pritchard et al., 2000)  
226 and the package pophelper (Francis, 2017). Genetic variation among populations was examined  
227 using a principal component analysis (PCA) in R.

228

229 *Statistical analyses*

230 *Microbiome richness and environmental and genetic correlates*

231 To test whether northern duckweed populations harbor more bacterial richness than southern  
232 populations, we conducted a general linear mixed model (LMM) with region (northern vs.  
233 southern) as the predictor and a nested random effect (states nested within regions) using the  
234 package lme4 (Bates et al., 2015). We conducted the LMM for both observed ASV richness and  
235 asymptotic ASV richness (Chao estimator) using iNEXT. To identify which environmental  
236 factors might influence the geographic distribution of bacterial richness, we focused on 19  
237 climatic and 13 water chemistry variables. We extracted the 19 climatic variables (WorldClim  
238 v2.1, 1970–2000) at 30 arc second resolution for the 34 populations. For water chemistry  
239 variables, we focused on pH, EC, TDS, nutrients (TOC, TN, TP, and C/N carbon to nitrogen  
240 ratio), and major and trace elements (Na, Ca, Mg, Si, Fe, and Mn). We did not consider some  
241 trace elements (Cd, Cu, Pb, and Zn) that showed little variation among populations or below the  
242 detection level (0.001 mg/L, Table S1). The water chemistry variables (except pH) were natural  
243 log transformed ( $\log(x+0.01)$ ) for analyses. For the climatic or water chemistry variables, we  
244 first conducted univariate regressions (general linear models, LMs) to select potential candidate  
245 predictors to be included in multiple regressions. We then used stepwise model selection (i.e.  
246 both forward and backward selections) of the multiple regressions based on the Akaike  
247 Information Criterion (AIC) to select the most parsimonious model and identify significant  
248 predictors. The lack of collinearity was confirmed based on the variance inflation factor (VIF).  
249 Duckweed genetic variation, represented by the first two axes of the genetic PCA (genetic PC1

250 and genetic PC2; Fig. 1c), was identified as non-significant predictors of bacterial richness by  
251 univariate regressions.

252

### 253 *Microbiome composition and environmental and genetic correlates*

254 To examine how diverse ecological processes, such as niche-based selection (by environments  
255 and host genetics), dispersal limitation, and chance, shaped bacterial community composition,  
256 we conducted four analyses. First, to assess the degree of distance decay in bacterial community  
257 similarity, we conducted a Mantel test between bacterial communities (the Bray–Curtis distance)  
258 and geographic distance using the package *vegan* (Oksanen et al., 2022). We further examined  
259 whether such distance decay was explained by geographic distance alone or environments. To do  
260 so, we conducted partial Mantel tests for climatic distance (all 19 climatic variables) and for  
261 water chemistry distance (all 13 water chemistry variables) while controlling for geographic  
262 distance. The climatic and water chemistry variables were (z-score) standardized prior to the  
263 estimation of their Euclidean distance among populations. The geographic distance was  
264 estimated based on the latitudes and longitudes of the populations (Table S1) using the package  
265 *geodist* (Padgham, 2021). Second, to quantify the relative importance of selection, dispersal, and  
266 chance in driving microbiome assembly among populations, we used a phylogenetic binning  
267 based null model analysis (*iCAMP*, Ning et al., 2020). Third, to further identify which  
268 environmental variables contributed to selection, we conducted univariate constrained principal  
269 component analysis (cPCoA) to select for potential predictors that may influence bacterial  
270 community composition. For the climatic variables, univariate cPCoAs revealed significant  
271 impact of all the 19 climatic variables, and thus we used the first two axes of the PCA of these  
272 climatic variables (climatic PC1 and PC2, accounting for 72.4% and 17.6% of total variation,

273 respectively; Fig. S2). For water chemistry, univariate cPCoAs identified the impact of seven  
274 variables (TN, TP, C/N, Ca, Mg, Fe, and pH), and we further used multivariate cPCoAs and  
275 stepwise model selection to reduce the potential water chemistry predictors to be included  
276 together with climatic PC1 and climatic PC2 for final model selection. The lack of collinearity  
277 was confirmed using VIFs. Fourth, to examine the influence of duckweed genetic variation,  
278 which can be potentially shaped by environmental selection (see analysis below), on bacterial  
279 community composition, we conducted variation partitioning of bacterial communities using the  
280 package *vegan* among duckweed genetic variation (genetic PC1 and genetic PC2), climate and  
281 water chemistry (with predictors identified by model selections described above).

282

### 283 *Duckweed genetic variation and environmental correlates*

284 To examine how duckweed genetic variation was influenced by environments, we used  
285 univariate and multiple regressions with stepwise model selection to identify significant  
286 environmental predictors of genetic PC1 and genetic PC2. As univariate regressions revealed  
287 significant impacts of many climatic variables on genetic PC1 and genetic PC2, we used climatic  
288 PC1 and climatic PC2 as potential predictors, along with the water chemistry predictors  
289 identified by univariate regressions, in multiple regressions for model selection.

290

## 291 **Results**

### 292 *Duckweed populations and microbiomes*

293 Similar to terrestrial plants (Wei & Ashman, 2018; Acosta et al., 2020), duckweed microbiomes  
294 were dominated by Proteobacteria (79% of the ASVs), especially Alphaproteobacteria (42%) and  
295 Gammaproteobacteria (36%), followed by Bacteroidetes (7%), Actinobacteria (5%), Firmicutes

296 (3%), and others (Fig. 1b). The microbiomes of duckweeds collected from the same populations  
297 (MA, Fig. 1b) were similar regardless of the sampling time (either during the peak or at the end  
298 of the growing season). Our analysis of duckweed genetic data revealed evidence of admixture  
299 (Fig. S3). We observed genetic differentiation between northern and southern populations along  
300 both the genetic PC1 and PC2 (Fig. 1c). We further found that genetic variation among  
301 duckweed populations was influenced by climate and water chemistry (Table S3). Specifically,  
302 duckweed genetic PC1 was influenced by precipitations (climatic PC2; multiple regression, LM:  
303  $t = 3.57, P = 0.002$ ) and water TN ( $t = 2.26, P = 0.035$ ), and marginally by pH ( $t = -1.96, P =$   
304  $0.063$ ; Table S3). Duckweed genetic PC2 was primarily influenced by temperatures (climatic  
305 PC1,  $t = 5.80, P < 0.001$ ; Table S3).

306

### 307 *Geographic variation of duckweed microbiome richness*

308 To test whether bacterial richness is higher in northern duckweed populations compared to  
309 southern populations, we used a LMM and found that the northern populations hosted 10% more  
310 bacterial ASVs than the southern populations (LS-mean; observed richness: northern =  $350 \pm 30$ ,  
311 southern =  $321 \pm 28$ , Fig. 2a; asymptotic richness: northern =  $428 \pm 44$ ; southern =  $388 \pm 39$ ;  
312 Fig. S4), while mean difference between northern and southern populations was not statistically  
313 significant ( $P > 0.05$ ; Fig. 2a and Fig. S4).

314 Among the 19 climatic variables, only the mean temperature of the driest quarter (BIO9)  
315 showed a significant impact on bacterial richness, with a negative association observed between  
316 temperature and bacterial richness (multiple regression, LM:  $t = -2.12, P = 0.042$ ; Fig. 2c and  
317 Fig. S4; Table S4). For water chemistry, while both concentrations of Na and TP were identified  
318 as potential factors influencing duckweed bacterial richness by univariate regressions, the

319 multiple regression revealed that only Na concentration had a significant impact on bacterial  
320 richness, with lower richness associated with higher Na concentrations (LM:  $t = -2.63$ ,  $P =$   
321  $0.013$ ; Fig. 2c and Fig. S4; Table S4). Unlike climate and water chemistry, the genetic variation  
322 of duckweed populations (genetic PC1 and PC2) did not influence bacterial richness ( $P > 0.05$ ;  
323 Table S4).

324

### 325 *Geographic variation of duckweed microbiome composition*

326 Duckweed bacterial communities exhibited distance decay in similarity (Mantel test,  $r = 0.46$ ,  $P$   
327  $= 0.001$ ; Fig. 3a). Such distance decay was not solely driven by geographic distance, but also by  
328 environmental factors ( $r_{\text{Climate|Geo}} = 0.27$ ,  $P = 0.001$ ;  $r_{\text{Water chemistry|Geo}} = 0.29$ ,  $P = 0.001$ ). This  
329 result indicated that both selection and dispersal limitation as well as chance influenced  
330 duckweed microbiome assembly. We further found that selection played an important role (26%)  
331 in structuring duckweed bacterial communities, in addition to dispersal limitation (33%) and  
332 chance (and other unidentified weak processes, 41%; Fig. 3b).

333       Among the environmental factors, climatic PC1 (temperatures) and PC2 (precipitations)  
334 together with water pH, TP, and Ca were the most important variables driving the geographic  
335 variation of duckweed bacterial community composition (cPCoA: climatic PC1, 7.2% of  
336 variation,  $F = 2.9$ ,  $P = 0.001$ ; climatic PC2, 4.3%,  $F = 1.7$ ,  $P = 0.006$ ; pH, 5.7%,  $F = 2.3$ ,  $P =$   
337  $0.001$ ; TP, 3.6%,  $F = 1.4$ ,  $P = 0.048$ ; Ca, 3.9%,  $F = 1.6$ ,  $P = 0.012$ ; Fig. 3c and Table S5).

338 Climatic PC1 (temperatures) and TP were found to influence bacterial community cPCoA 1,  
339 while climatic PC2 (precipitations), pH, and Ca were found to influence cPCoA 2 (Fig. 3c).

340 Based on the subset of populations ( $N = 25$ ) with duckweed genetic data, we found that  
341 duckweed genetic variation affected bacterial community composition (cPCoA: genetic PC1,

342 7.7%,  $F = 2.0$ ,  $P = 0.001$ ; genetic PC2, 9.9%,  $F = 2.6$ ,  $P = 0.001$ ; Table S5). Variation  
343 partitioning analysis further pointed out the collective roles of climate, water chemistry, and host  
344 genetic variation on duckweed bacterial community composition (Fig. 3d).

345

## 346 **Discussion**

347 Our study on the microbiomes of wide-ranging duckweeds revealed that the geographic  
348 distribution of plant microbiome diversity supported the standing hypothesis of microbial  
349 biogeography, with bacterial richness higher in temperate regions relative to lower latitudes as  
350 observed in free-living environmental microbiomes. We also found that temperature (of the  
351 driest quarter, BIO9) and Na concentration showed a negative impact on the distribution of  
352 duckweed bacterial richness, while host genetic variation showed no strong effect. In contrast to  
353 bacterial richness, the geographic variation of duckweed bacterial community composition was  
354 influenced by all 19 climatic variables, including temperatures (climatic PC1) and precipitations  
355 (climatic PC2), and water chemistry variables such as pH and concentrations of TP and Ca. Our  
356 results further underscored the collective roles of host genetic variation, climate, and water  
357 chemistry in driving duckweed bacterial community composition.

358

### 359 *Bacterial richness of plant microbiomes is higher in temperate populations*

360 Our findings of higher bacterial richness in temperate relative to subtropical duckweed  
361 populations were consistent with global patterns of microbial biogeography in free-living  
362 microbiomes across ecosystems, including soil, marine, and airborne microbiomes (Tedersoo et  
363 al., 2014; Sunagawa et al., 2015; Bahram et al., 2018; Zhao et al., 2022). Similar to wild plants  
364 such as duckweeds, a latitudinal pattern of increased bacterial richness has also been observed in



365 crops such as the rhizosphere microbiomes associated with soybean from tropical to temperate  
366 regions (Zhang et al., 2018). In our study, we observed a 10% higher bacterial richness in  
367 temperate duckweed populations compared to subtropical populations, while the mean difference  
368 between the two regions was not statistically significant. This suggests that other factors, which  
369 do not follow a latitudinal pattern, might influence duckweed bacterial richness, such as Na  
370 concentration in freshwater ecosystems (Fig. 2c). We found that Na concentration negatively  
371 impacted bacterial richness in these natural duckweed populations. This negative impact of Na  
372 concentration on microbial growth has also been demonstrated experimentally in duckweeds  
373 (O'Brien et al., 2020). Interestingly, we observed high Na concentration in some populations  
374 from both temperate and subtropical regions (Table S1), potentially reflecting road salt use in the  
375 north and proximity to seawater in the south. This suggests that factors such as increased salinity  
376 in freshwater ecosystems due to, for instance, road salt flux (Kaushal et al., 2005; Hintz et al.,  
377 2022) and sea level rise (Jackson & Jevrejeva, 2016; Dangendorf et al., 2017), as well as  
378 increased temperature (IPCC, 2022), under global change may have negative impacts on plant  
379 microbiome richness and their latitudinal patterns.

380

381 *Environmental factors influence the geographic variation of plant microbiome composition*

382 The geographic variation of duckweed bacterial community composition among populations  
383 exhibited distance decay, driven by diverse ecological processes. Among these processes,  
384 dispersal limitation and chance played a major role (74%), similar to the observations (70–80%)  
385 in global distributions of free-living soil and marine microbiomes (Zhao et al., 2022). Consistent  
386 with global soil microbiomes (Zhao et al., 2022), selection accounted for 26% of the influence in  
387 driving the geographic variation of duckweed bacterial community composition. Specifically,

388 environmental pH, which is a dominant driver of global soil bacterial community composition  
389 (Fierer & Jackson, 2006; Bahram et al., 2018), was also found to influence duckweed bacterial  
390 community composition in the aquatic environments here. Similar to marine microbiomes  
391 (Sunagawa et al., 2015), temperatures strongly impacted duckweed bacterial community  
392 composition. Such effects of temperature and pH on bacterial community composition have also  
393 been demonstrated experimentally in duckweeds (Calicioglu et al., 2018). Additionally,  
394 phosphorus, one of the most important limiting factors in freshwater ecosystems (Hudson et al.,  
395 2000), influenced duckweed bacterial community composition, similar to observations in  
396 bacterial communities associated with marine algae (Martin et al., 2021). Furthermore, we found  
397 that calcium concentration, reflecting hardness of aquatic environments, was also driving  
398 duckweed bacterial community composition, independent from the strong impact of pH (after  
399 model selection). Our study, together with previous research, point to some general principles of  
400 microbial biogeography regarding the influence of selection by environments and the underlying  
401 drivers. These findings highlight the potential impacts on the distribution of microbiome  
402 composition of climate change and anthropogenic activities, particularly in terms of nutrient  
403 deposition and discharge into ecosystems (Schlesinger, 2009; Tipping et al., 2014), and the  
404 overall quality of aquatic environments.

405

406 *Host genetic variation plays a role in the geographic distribution of plant microbiomes*

407 While we have highlighted the similarities in the patterns and mechanisms of microbial  
408 biogeography between plant microbiomes and free-living environmental microbiomes, our  
409 findings also emphasized the joint role of plant genetic variation and environmental variation.  
410 Different from soil microbiomes, where aboveground plant diversity does not influence bacterial

411 community composition (Fierer & Jackson, 2006; Tedersoo et al., 2014; Bahram et al., 2018),  
412 our study showed that plant genetic variation influenced duckweed bacterial community  
413 composition (Table S5) via its joint effect with climate and water chemistry, rather than their  
414 independent effects (Fig. 3d). This was primarily because the genetic variation of duckweeds  
415 was strongly influenced by the same factors that influenced their microbiome composition, such  
416 as temperatures, precipitations, nitrogen concentration (which was correlated with phosphorus  
417 concentration), and pH. The strong coupling of host genetic variation and microbiomes with  
418 environmental factors made it challenging to separate the effects of host genetic and  
419 environmental variation on microbiome composition in natural populations without manipulative  
420 experiments. This observation should not be unique to duckweeds but is expected to be common  
421 in plant microbiomes, because local adaptation to environments is a widespread phenomenon in  
422 plants (Leimu & Fischer, 2008). This observation underscores the potential for even stronger  
423 impacts on the distribution, structure, and function of plant microbiomes in the cases of  
424 misaligned responses between plants and microbes to climate change and anthropogenic  
425 activities.

426

## 427 **Conclusions**

428 Our study elucidates the geographic distribution of plant microbiome structure and the  
429 underlying mechanisms, highlighting both the commonalities and differences in microbial  
430 biogeography relative to free-living environmental microbiomes. Our findings call for the need  
431 of additional research across diverse plant species and populations, geographic scales, and  
432 ecosystems to further advance our understanding of the principles of microbial biogeography.  
433 The key drivers identified in our study, including temperatures, precipitations, pH, and

434 concentrations of sodium, phosphorus, and calcium, along with host genetic variation, provide  
435 important insights into predicting the vulnerability and resilience of plant microbiomes and their  
436 impacts on ecosystem functioning under changing climates and intensifying anthropogenic  
437 activities.

438

439

#### 440 **References**

441 Acosta, K., Appenroth, K.J., Borisjuk, L., Edelman, M., Heinig, U., Jansen, M.A.K., Oyama, T.,  
442 Pasaribu, B., Schubert, I., Sorrels, S., Sree, K.S., Xu, S., Michael, T.P. & Lam, E. (2021)  
443 Return of the Lemnaceae: duckweed as a model plant system in the genomics and  
444 postgenomics era. *The Plant Cell*, 33(10), 3207-3234.

445 <http://doi.org/10.1093/plcell/koab189>

446 Acosta, K., Xu, J., Gilbert, S., Denison, E., Brinkman, T., Lebeis, S. & Lam, E. (2020)

447 Duckweed hosts a taxonomically similar bacterial assemblage as the terrestrial leaf  
448 microbiome. *PLoS One*, 15(2), e0228560. <http://doi.org/10.1371/journal.pone.0228560>

449 Bahram, M., Hildebrand, F., Forslund, S.K., Anderson, J.L., Soudzilovskaia, N.A., Bodegom,

450 P.M., Bengtsson-Palme, J., Anslan, S., Coelho, L.P., Harend, H., Huerta-Cepas, J.,

451 Medema, M.H., Maltz, M.R., Mundra, S., Olsson, P.A., Pent, M., Pöhlme, S., Sunagawa,

452 S., Ryberg, M., Tedersoo, L. *et al.* (2018) Structure and function of the global topsoil

453 microbiome. *Nature*, 560(7717), 233-237. <http://doi.org/10.1038/s41586-018-0386-6>

454 Bates, D., Machler, M., Bolker, B.M. & Walker, S.C. (2015) Fitting linear mixed-effects models

455 using lme4. *Journal of Statistical Software*, 67(1), 1-48.

456 <https://doi.org/10.18637/jss.v067.i01>

- 457 Braglia, L., Breviario, D., Giani, S., Gavazzi, F., De Gregori, J. & Morello, L. (2021) New  
458 insights into interspecific hybridization in *Lemna* L. Sect. *Lemna* (Lemnaceae Martinov).  
459 *Plants*, 10(12), 2767. <http://doi.org/10.3390/plants10122767>
- 460 Calicioglu, O., Shreve, M.J., Richard, T.L. & Brennan, R.A. (2018) Effect of pH and  
461 temperature on microbial community structure and carboxylic acid yield during the  
462 acidogenic digestion of duckweed. *Biotechnology for Biofuels*, 11, 275.  
463 <http://doi.org/10.1186/s13068-018-1278-6>
- 464 Callahan, B.J., McMurdie, P.J., Rosen, M.J., Han, A.W., Johnson, A.J. & Holmes, S.P. (2016)  
465 DADA2: High-resolution sample inference from Illumina amplicon data. *Nature*  
466 *Methods*, 13(7), 581-583. <http://doi.org/10.1038/nmeth.3869>
- 467 Cao, H.X., Fourounjian, P. & Wang, W. (2018) The importance and potential of duckweeds as a  
468 model and crop plant for biomass-based applications and beyond. *Handbook of*  
469 *environmental materials management* (ed. C.M. Hussain), pp. 1-16. Springer  
470 International Publishing.
- 471 Chu, H., Gao, G.-F., Ma, Y., Fan, K. & Delgado-Baquerizo, M. (2020) Soil microbial  
472 biogeography in a changing world: Recent advances and future perspectives. *mSystems*,  
473 5(2), e00803-00819. <http://doi.org/10.1128/mSystems.00803-19>
- 474 Dangendorf, S., Marcos, M., Wöppelmann, G., Conrad, C.P., Frederikse, T. & Riva, R. (2017)  
475 Reassessment of 20th century global mean sea level rise. *Proceedings of the National*  
476 *Academy of Sciences*, 114(23), 5946-5951. <http://doi.org/10.1073/pnas.1616007114>
- 477 Fierer, N. & Jackson, R.B. (2006) The diversity and biogeography of soil bacterial communities.  
478 *Proceedings of the National Academy of Sciences*, 103(3), 626-631.  
479 <http://doi.org/doi:10.1073/pnas.0507535103>

- 480 Francis, R.M. (2017) pophelper: an R package and web app to analyse and visualize population  
481 structure. *Molecular ecology resources*, 17(1), 27-32. <https://doi.org/10.1111/1755->  
482 0998.12509
- 483 Heras, J., Domínguez, C., Mata, E., Pascual, V., Lozano, C., Torres, C. & Zarazaga, M. (2015)  
484 GelJ – a tool for analyzing DNA fingerprint gel images. *BMC Bioinformatics*, 16(1), 270.  
485 <https://doi.org/10.1186/s12859-015-0703-0>
- 486 Hintz, W.D., Arnott, S.E., Symons, C.C., Greco, D.A., McClymont, A., Brentrup, J.A., Canedo-  
487 Arguelles, M., Derry, A.M., Downing, A.L., Gray, D.K., Melles, S.J., Relyea, R.A.,  
488 Rusak, J.A., Searle, C.L., Astorg, L., Baker, H.K., Beisner, B.E., Cottingham, K.L.,  
489 Ersoy, Z., Espinosa, C. *et al.* (2022) Current water quality guidelines across North  
490 America and Europe do not protect lakes from salinization. *Proceedings of the National*  
491 *Academy of Sciences*, 119(9). <http://doi.org/10.1073/pnas.2115033119>
- 492 Hsieh, T.C., Ma, K.H. & Chao, A. (2020) iNEXT: iNterpolation and EXTrapolation for species  
493 diversity. R package version 2.0.20. <http://chao.stat.nthu.edu.tw/wordpress/software->  
494 [download/](http://chao.stat.nthu.edu.tw/wordpress/software-download/)
- 495 Hudson, J.J., Taylor, W.D. & Schindler, D.W. (2000) Phosphate concentrations in lakes. *Nature*,  
496 406(6791), 54-56. <http://doi.org/10.1038/35017531>
- 497 IPCC (2022) Climate change 2022: Mitigation of climate change. Contribution of working group  
498 iii to the sixth assessment report of the intergovernmental panel on climate change. (eds  
499 P.R. Shukla, J. Skea, R. Slade, A. Al Khourdajie, R. Van Diemen, D. McCollum, M.  
500 Pathak, S. Some, P. Vyas & R. Fradera). Cambridge University Press, Cambridge, UK  
501 and New York, NY, USA, <http://doi.org/10.1017/9781009157926>.

- 502 Jackson, L.P. & Jevrejeva, S. (2016) A probabilistic approach to 21st century regional sea-level  
503 projections using RCP and high-end scenarios. *Global and Planetary Change*, 146, 179-  
504 189. <https://doi.org/10.1016/j.gloplacha.2016.10.006>
- 505 Kaushal, S.S., Groffman, P.M., Likens, G.E., Belt, K.T., Stack, W.P., Kelly, V.R., Band, L.E. &  
506 Fisher, G.T. (2005) Increased salinization of fresh water in the northeastern United  
507 States. *Proceedings of the National Academy of Sciences*, 102(38), 13517-13520.  
508 <http://doi.org/10.1073/pnas.0506414102>
- 509 Laforest-Lapointe, I., Paquette, A., Messier, C. & Kembel, S.W. (2017) Leaf bacterial diversity  
510 mediates plant diversity and ecosystem function relationships. *Nature*, 546(7656), 145-  
511 147. <http://doi.org/10.1038/nature22399>
- 512 Landolt, E. (1986) *The family of Lemnaceae—a monographic study, Vol. 1: Morphology,*  
513 *karyology, ecology, geographic distribution, systematic position, nomenclature,*  
514 *descriptions.* Veröffentlichungen des Geobotanischen Institutes der Eidgenössischen  
515 Technischen Hochschule, Stiftung Rubel, Zurich.
- 516 Leimu, R. & Fischer, M. (2008) A meta-analysis of local adaptation in plants. *PLoS One*, 3(12),  
517 e4010. <https://doi.org/10.1371/journal.pone.0004010>
- 518 Martin, K., Schmidt, K., Toseland, A., Boulton, C.A., Barry, K., Beszteri, B., Brussaard, C.P.D.,  
519 Clum, A., Daum, C.G., Eloë-Fadrosh, E., Fong, A., Foster, B., Foster, B., Ginzburg, M.,  
520 Huntemann, M., Ivanova, N.N., Kyrpides, N.C., Lindquist, E., Mukherjee, S.,  
521 Palaniappan, K. *et al.* (2021) The biogeographic differentiation of algal microbiomes in  
522 the upper ocean from pole to pole. *Nature Communications*, 12(1), 5483.  
523 <http://doi.org/10.1038/s41467-021-25646-9>

- 524 McMurdie, P.J. & Holmes, S. (2013) phyloseq: an R package for reproducible interactive  
525 analysis and graphics of microbiome census data. *PLoS One*, 8(4), e61217.  
526 <http://doi.org/10.1371/journal.pone.0061217>
- 527 Mittelbach, G.G. & Schemske, D.W. (2015) Ecological and evolutionary perspectives on  
528 community assembly. *Trends in Ecology & Evolution*, 30(5), 241-247.  
529 <https://doi.org/10.1016/j.tree.2015.02.008>
- 530 Ning, D., Yuan, M., Wu, L., Zhang, Y., Guo, X., Zhou, X., Yang, Y., Arkin, A.P., Firestone,  
531 M.K. & Zhou, J. (2020) A quantitative framework reveals ecological drivers of grassland  
532 microbial community assembly in response to warming. *Nature Communications*, 11(1),  
533 4717. <http://doi.org/10.1038/s41467-020-18560-z>
- 534 O'Brien, A.M., Yu, Z.H., Luo, D.Y., Laurich, J., Passeur, E. & Frederickson, M.E. (2020)  
535 Resilience to multiple stressors in an aquatic plant and its microbiome. *American Journal*  
536 *of Botany*, 107(2), 273-285. <http://doi.org/10.1002/ajb2.1404>
- 537 Oksanen, J., Blanchet, F.G., Friendly, M., Kindt, R., Legendre, P., McGlenn, D., Minchin, P.R.,  
538 O'Hara, R.B., Simpson, G.L., Solymos, P., Stevens, M.H.H., Szoecs, E. & Helene, W.  
539 (2022) vegan: Community Ecology Package. R package version 2.6-4. [https://CRAN.R-](https://CRAN.R-project.org/package=vegan)  
540 [project.org/package=vegan](https://CRAN.R-project.org/package=vegan).
- 541 Padgham, M. (2021) geodist: Fast, Dependency-Free Geodesic Distance Calculations. R package  
542 version 0.0.7. <https://github.com/hypertidy/geodist>.
- 543 Pritchard, J.K., Stephens, M. & Donnelly, P. (2000) Inference of population structure using  
544 multilocus genotype data. *Genetics*, 155(2), 945-959.  
545 <http://doi.org/10.1093/genetics/155.2.945>



- 546 R Core Team (2021) *R: A language and environment for statistical computing*. R Foundation for  
547 Statistical Computing, Vienna, Austria. <https://www.R-project.org/>.
- 548 Rosenzweig, M.L. (1995) *Species diversity in space and time*. Cambridge University Press,  
549 Cambridge. <http://doi.org/10.1017/CBO9780511623387>.
- 550 Schlesinger, W.H. (2009) On the fate of anthropogenic nitrogen. *Proceedings of the National*  
551 *Academy of Sciences*, 106(1), 203-208. <http://doi.org/10.1073/pnas.0810193105>
- 552 Sunagawa, S., Coelho, L.P., Chaffron, S., Kultima, J.R., Labadie, K., Salazar, G., Djahanschiri,  
553 B., Zeller, G., Mende, D.R., Alberti, A., Cornejo-Castillo, F.M., Costea, P.I., Cruaud, C.,  
554 d'Ovidio, F., Engelen, S., Ferrera, I., Gasol, J.M., Guidi, L., Hildebrand, F., Kokoszka, F.  
555 *et al.* (2015) Structure and function of the global ocean microbiome. *Science*, 348(6237),  
556 1261359. <http://doi.org/10.1126/science.1261359>
- 557 Tan, J., Wei, N. & Turcotte, M. (2023) Trophic interactions in microbiomes influence plant host  
558 population size and ecosystem function. *bioRxiv*.  
559 <https://doi.org/10.1101/2023.03.06.531362>
- 560 Tedersoo, L., Bahram, M., Põlme, S., Kõljalg, U., Yorou, N.S., Wijesundera, R., Ruiz, L.V.,  
561 Vasco-Palacios, A.M., Thu, P.Q., Suija, A., Smith, M.E., Sharp, C., Saluveer, E., Saitta,  
562 A., Rosas, M., Riit, T., Ratkowsky, D., Pritsch, K., Põldmaa, K., Piepenbring, M. *et al.*  
563 (2014) Global diversity and geography of soil fungi. *Science*, 346(6213), 1256688.  
564 <http://doi.org/10.1126/science.1256688>
- 565 Tipping, E., Benham, S., Boyle, J.F., Crow, P., Davies, J., Fischer, U., Guyatt, H., Helliwell, R.,  
566 Jackson-Blake, L., Lawlor, A.J., Monteith, D.T., Rowe, E.C. & Toberman, H. (2014)  
567 Atmospheric deposition of phosphorus to land and freshwater. *Environmental Science:*  
568 *Processes & Impacts*, 16(7), 1608-1617. <http://doi.org/10.1039/C3EM00641G>

- 569 Vellend, B.M. (2010) Conceptual synthesis in community ecology. *The Quarterly Review of*  
570 *Biology*, 85(2), 183-206. <http://doi.org/10.1086/652373>
- 571 Wei, N. & Ashman, T.-L. (2018) The effects of host species and sexual dimorphism differ  
572 among root, leaf and flower microbiomes of wild strawberries *in situ*. *Scientific Reports*,  
573 8, 5195. <http://doi.org/10.1038/s41598-018-23518-9>
- 574 Wei, N., Russell, A.L., Jarrett, A.R. & Ashman, T.-L. (2021) Pollinators mediate floral microbial  
575 diversity and microbial network under agrochemical disturbance. *Molecular Ecology*,  
576 30(10), 2235-2247. <https://doi.org/10.1111/mec.15890>
- 577 Wei, N., Whyte, R.L., Ashman, T.-L. & Jamieson, M.A. (2022) Genotypic variation in floral  
578 volatiles influences floral microbiome more strongly than interactions with herbivores  
579 and mycorrhizae in strawberries. *Horticulture Research*, 9, uhab005.  
580 <http://doi.org/10.1093/hr/uhab005>
- 581 Zhang, B., Zhang, J., Liu, Y., Guo, Y., Shi, P. & Wei, G. (2018) Biogeography and ecological  
582 processes affecting root-associated bacterial communities in soybean fields across China.  
583 *Science of the Total Environment*, 627, 20-27.  
584 <http://doi.org/10.1016/j.scitotenv.2018.01.230>
- 585 Zhao, J., Jin, L., Wu, D., Xie, J.W., Li, J., Fu, X.W., Cong, Z.Y., Fu, P.Q., Zhang, Y., Luo, X.S.,  
586 Feng, X.B., Zhang, G., Tiedje, J.M. & Li, X.D. (2022) Global airborne bacterial  
587 community-interactions with Earth's microbiomes and anthropogenic activities.  
588 *Proceedings of the National Academy of Sciences*, 119(42), e2204465119.  
589 <http://doi.org/10.1073/pnas.2204465119>  
590  
591

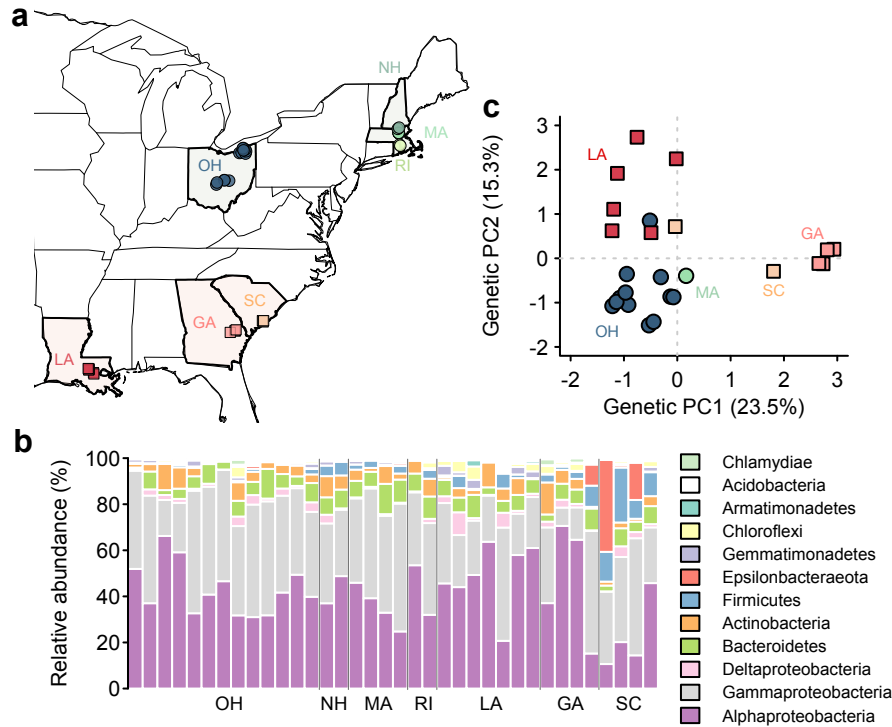

592

593 **Fig. 1 *Lemna* populations and microbiomes.** (a) We collected the *Lemna* species complex from

594 the northern and southern range of its distribution in the United States (34 total populations: OH,

595 13; NH, 2; MA, 2; RI, 2; LA, 7; GA, 4; SC, 4). (b) The top 10 most abundant phyla (class level

596 for Proteobacteria) of *Lemna* bacterial microbiomes. The two MA populations (referred to as

597 MA.1 and MA.2) were sampled at two separate times during the peak (June–August) and the end

598 of the growing season (October) in 2022. The order of the four MA samples in the plot follows

599 MA.1 (peak and end season) and then MA.2 (peak and end season). (c) We obtained *Lemna*

600 genetic data for 25 out of the 34 populations based on ISSR markers. *Lemna* genetic variation

601 was examined using a PCA.

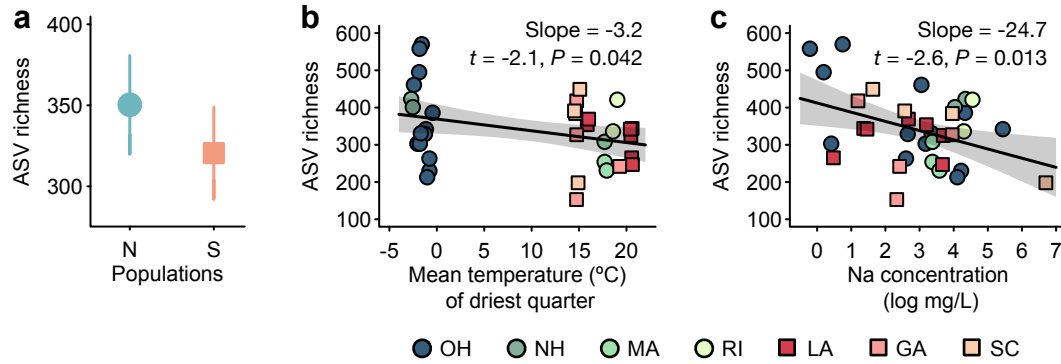

602

603 **Fig. 2 Environmental drivers of *Lemna* microbiome richness.** (a) The least-squares mean (LS

604 mean)  $\pm$  SE of bacterial ASV richness are plotted for the northern populations ('N': OH, NH,

605 MA, RI) and southern populations ('S': LA, GA, SC) using a general linear mixed model with

606 region (northern vs. southern) as the predictor and states nested within regions as the random

607 effect. (b) The mean temperature of driest quarter (BIO9) and (c) the (natural log transformed)

608 Na concentration of aquatic environments were identified as the important factors driving the

609 distribution of bacterial richness of *Lemna* microbiomes after model selection of multiple

610 regressions. Slopes with shaded 95% confidence intervals are shown. For statistical details, see

611 Table S4.

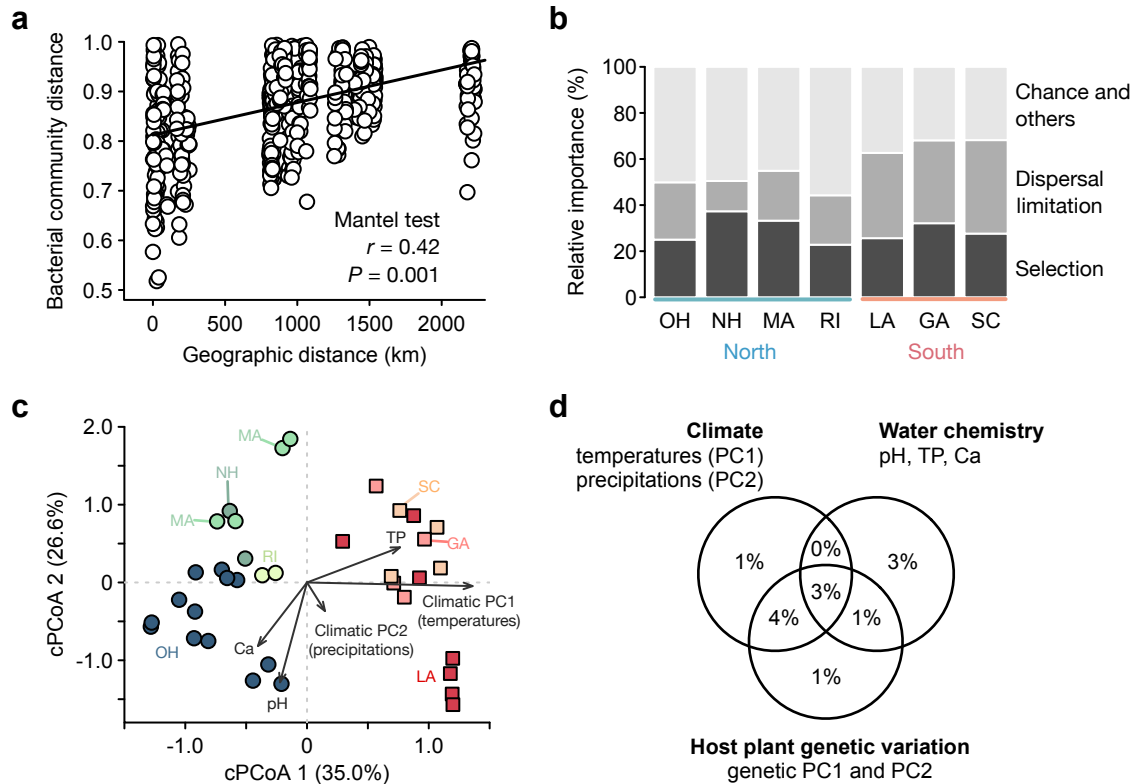

612

613 **Fig. 3 Ecological processes underlying the geographic variation of *Lemna* microbiome**

614 **composition.** (a) The Mantel test indicates a significant correlation between the Bray-Curtis

615 distance of bacterial communities and geographic distance. (b) The relative importance of

616 ecological processes driving *Lemna* microbiome assembly was quantified using the package

617 iCAMP. We focused on selection (homogeneous and heterogeneous selections), dispersal

618 limitation, and chance, whereas ‘others’ encompass weak processes (iCAMP) including

619 homogenizing dispersal here. (c) The first two axes of the 19 climatic variables (climatic PC1

620 and climatic PC2), pH, and concentrations of total phosphorus (TP) and calcium (Ca) were

621 identified as the most important factors driving variation in *Lemna* bacterial community

622 composition after model selection of constrained principal component analyses (cPCoAs). (d)

623 Variation partitioning indicates the collective roles of duckweed genetic variation, climate, and

624 water chemistry in explaining the geographic variation of *Lemna* bacterial community

625 composition. For statistical details, see Table S5.

626

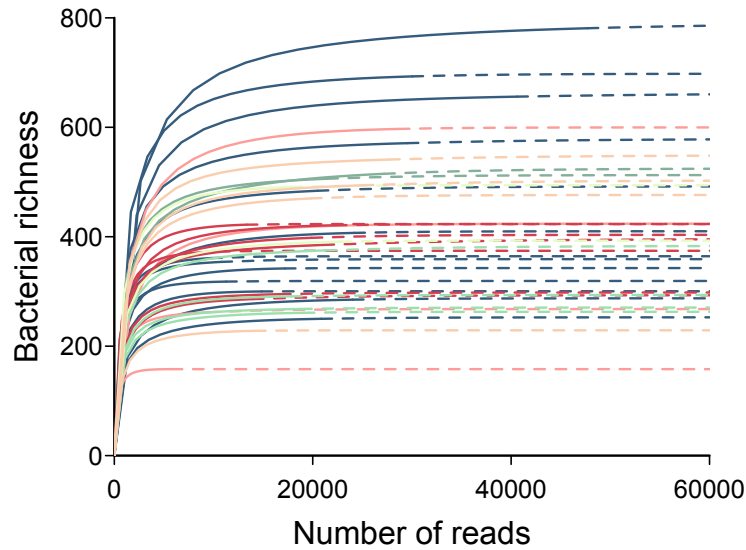

627

628 **Fig. S1 Rarefaction reveals that the majority of the bacterial richness of *Lemna***  
629 **microbiomes was captured by the sequencing effort.** The number of reads is represented by  
630 the solid portion of each line, whereas the dashed portion indicates extrapolation in the  
631 rarefaction analysis using the R package iNEXT. Colors indicate the different origins (states) of  
632 duckweed populations.

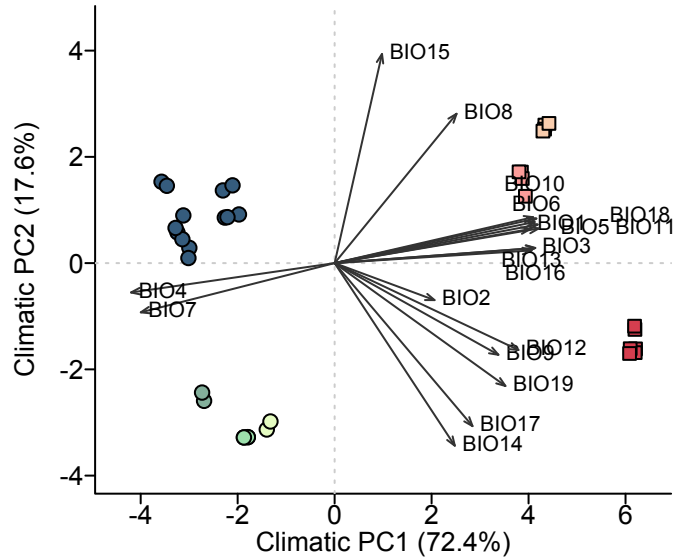

633

634 **Fig. S2 The climatic PCA of *Lemna* populations.** The climatic PCA was based on the 19  
635 climatic variables of the 34 *Lemna* populations. BIO1 = Annual Mean Temperature; BIO2 =  
636 Mean Diurnal Range (Mean of monthly (max temp - min temp)); BIO3 = Isothermality  
637 (BIO2/BIO7) ( $\times 100$ ); BIO4 = Temperature Seasonality (standard deviation  $\times 100$ ); BIO5 = Max  
638 Temperature of Warmest Month; BIO6 = Min Temperature of Coldest Month; BIO7 =  
639 Temperature Annual Range (BIO5-BIO6); BIO8 = Mean Temperature of Wettest Quarter; BIO9  
640 = Mean Temperature of Driest Quarter; BIO10 = Mean Temperature of Warmest Quarter; BIO11  
641 = Mean Temperature of Coldest Quarter; BIO12 = Annual Precipitation; BIO13 = Precipitation  
642 of Wettest Month; BIO14 = Precipitation of Driest Month; BIO15 = Precipitation Seasonality  
643 (Coefficient of Variation); BIO16 = Precipitation of Wettest Quarter; BIO17 = Precipitation of  
644 Driest Quarter; BIO18 = Precipitation of Warmest Quarter; BIO19 = Precipitation of Coldest  
645 Quarter.

646



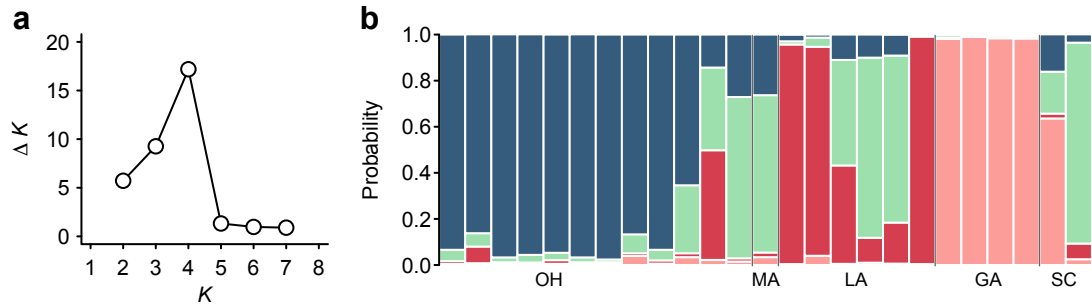

647

648 **Fig. S3 STRUCTURE results of *Lemna*.** (a) The inference of populations ( $K$ ) identifies four

649 genetic clusters. (b) Inferred admixture plot of the 25 *Lemna* samples is displayed at  $K = 4$ .

650

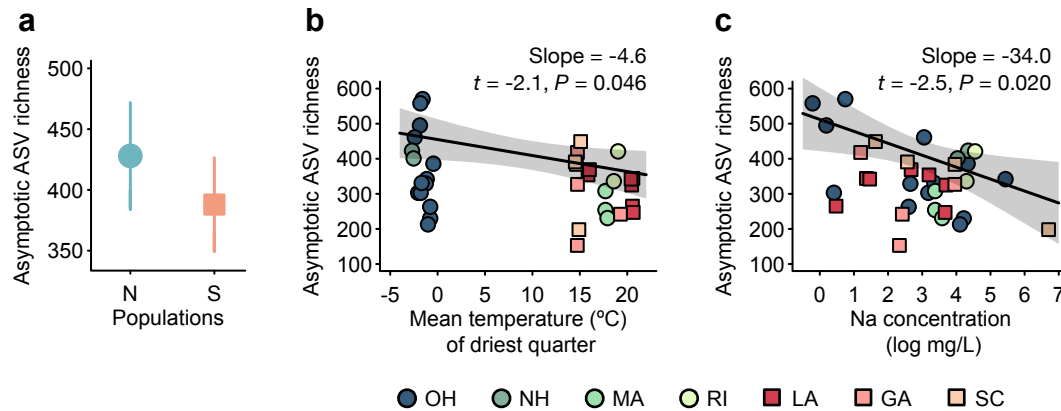

Source: https://www.biorxiv.org/content/10.1101/2023.03.20.533563v1.full.pdf
